# Supplementary material
Source: publisher site journal article supplement (https://www.dovepress.com/article/292513)
Supplement: Supplementary file 1 [file get_supplementary_file.php]

SUPPLEMENTARY FIGURE: **In vitro phenotype induction of circulating monocytes: CD16 and CD163 analysis**

Supplementary Figure 1


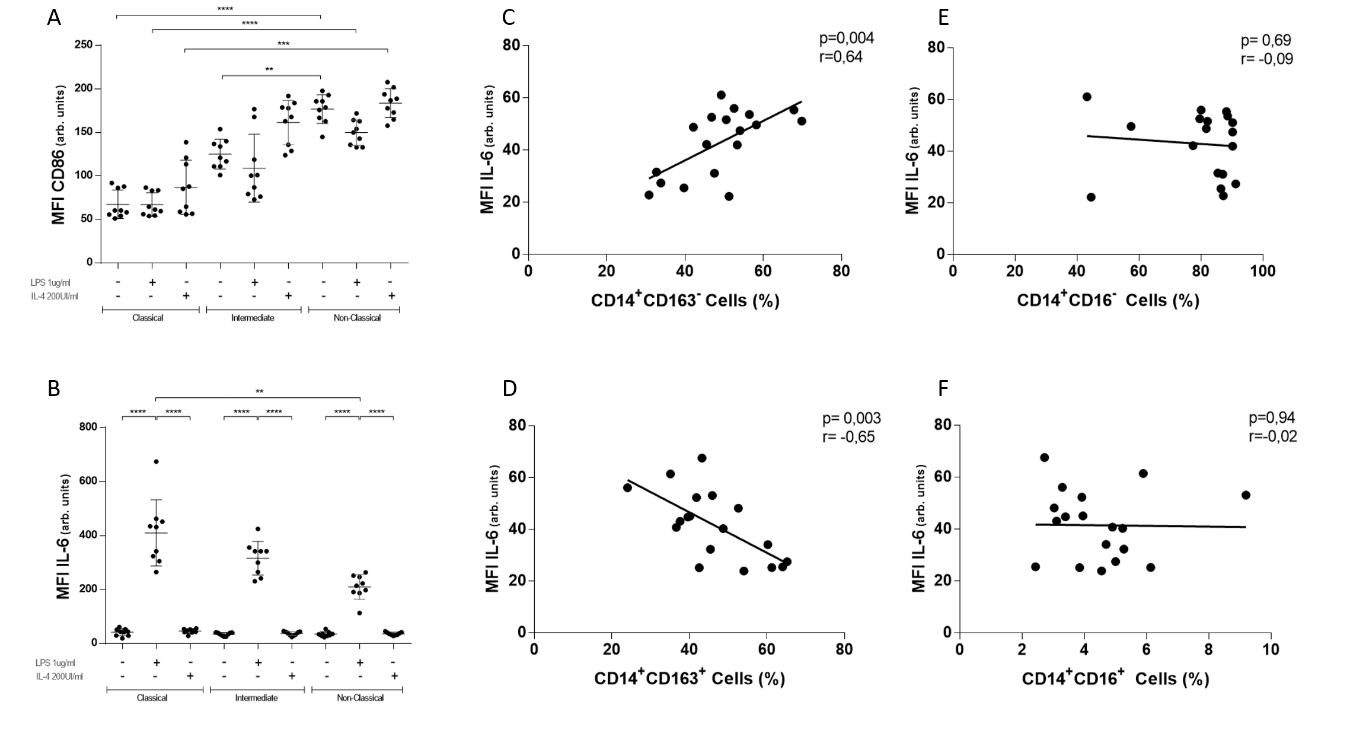


Supplementary Figure Legend

**SUPPLEMENTARY FIGURE 1:** *CD86 and IL-6 analysis on each subset and stimulation condition*. CD86 median fluorescence intensity is significantly higher in non-classical monocytes versus classical monocytes, nevertheless, upon LPS stimulation there are no changes in MFI after LPS or IL-4 stimulation (A) (****p≤0,0001; ***p≤0,0023; **p≤0,008). On each subpopulation, levels of IL-6 are higher when stimulated with LPS, being significantly higher in Classical versus Non-classical monocytes (B) (****p≤0,0001; **p≤0,008). In (C and D), intracellular IL-6 correlates positively and significantly with CD163- cell percentage and negatively with CD163+ cell percentage. In (E and F), IL-6 does not correlate with CD16+ and CD16- cells percentages. BD LSRFortessa Cytometer. One-way ANOVA test used in panels (A and B). Spearman rank correlation test (n=18) in panels C to F.
